# Supplementary material
Source: MDPI journal article supplement (https://www.mdpi.com/2313-4321/8/6/99)
Supplement: s1 [file s1]

# Quantification of plastics in agriculture and fisheries at a regional scale: a case study of South West England

M.E. Correa-Cano<sup>1</sup>, K. Burton<sup>3</sup>, M. Mueller<sup>1</sup>, V. Kouloumpis<sup>1</sup>, and X. Yan<sup>1</sup>

## Supplementary material

Table S1. Total agricultural land per crop grown in the SW in 2018 in hectares (South West includes Cornwall, Devon and Somerset. Source: CEH Land Cover® Plus: Crops 2018).

| <b>Crop</b>                  | <b>Cornwall</b>   | <b>Devon</b>      | <b>Somerset</b>   | <b>Total</b>      | <b>Percentage</b> |
|------------------------------|-------------------|-------------------|-------------------|-------------------|-------------------|
| <i>Field beans</i>           | -                 | 310.55            | 1,314.35          | 1,624.90          | 0.2%              |
| <i>Potato</i>                | 4,709.84          | 952.75            | 849.60            | 6,512.19          | 0.9%              |
| <i>Oilseed rape</i>          | 764.77            | 3,132.47          | 4,226.54          | 8,123.78          | 1.1%              |
| <i>Spring barley</i>         | 7,468.32          | 7,055.34          | 1,129.44          | 15,653.09         | 2.0%              |
| <i>Spring wheat</i>          | 6,673.01          | 6,432.67          | 4,151.98          | 17,257.67         | 2.3%              |
| <i>Other crops</i>           | 8,646.99          | 5,774.46          | 6,184.05          | 20,605.50         | 2.7%              |
| <i>Winter barley</i>         | 7,182.93          | 11,332.66         | 10,623.16         | 29,138.76         | 3.8%              |
| <i>Maize</i>                 | 6,571.91          | 13,817.44         | 13,642.95         | 34,032.30         | 4.4%              |
| <i>Winter wheat and oats</i> | 6,850.21          | 16,530.00         | 16,717.78         | 40,097.99         | 5.2%              |
| <i>Grass</i>                 | 139,025.87        | 296,261.80        | 156,995.60        | 592,283.27        | 77.4%             |
| <b>Total</b>                 | <b>187,893.85</b> | <b>361,600.14</b> | <b>215,835.44</b> | <b>765,329.44</b> |                   |

**Data S1. Questions send to Fleet managers and Harbour Masters of the South West of the UK.**

**Fleet managers survey**

Q1. Are you a current fishing fleet manager based in the South West region?

Yes\_\_\_

No, please state role\_\_\_\_\_

Q2. How often do your fishing nets usually need to be replaced?

Please indicate the approximate time for each item:

Gill net:\_\_\_\_\_

Trawl net\_\_\_\_\_

Pots:\_\_\_\_\_

Rope/line:\_\_\_\_\_

Other, please indicate:\_\_\_\_\_

Don't know:\_\_\_\_\_

Q3. How much is the approximate cost to your fleet of replacement gear?

Please indicate the cost for the gear that you usually use.

Gill net:\_\_\_\_\_

Trawl net\_\_\_\_\_

Pots:\_\_\_\_\_

Rope/line:\_\_\_\_\_

Other, please indicate:\_\_\_\_\_

Don't know:\_\_\_\_\_

Q4. Have any of your nets or gear been entangled, lost at sea, or damaged beyond

Yes\_\_\_\_\_

No\_\_\_\_\_

Don't know\_\_\_\_\_

Q5. How many nets, pots, or lines have been entangled, lost at sea, or damaged beyond repair in the last year?

Q6. What is the approximate financial cost of lost gear in the last year?

Q7. Do you work with any ocean waste recovery projects, for instance Fishing for Litter?

Yes, please state\_\_\_\_

No\_\_

Q.8 Please indicate any support mechanisms that could be introduced to reduce the amount of lost fishing gear in the South West?

Q9. What are the major challenges for the South West fishing industry in 2020?

### **Harbour masters survey**

Q1. Are you currently a Harbour Master/Port Manager?

Yes\_\_

No, please state role\_\_\_\_\_

Q2. Does your Port provide reception facilities for fishing vessel waste?

Yes\_\_\_\_\_

No\_\_\_\_\_

Sometimes\_\_\_\_\_

Don't know\_\_\_\_\_

Q3. Where does the fishing vessel waste go? (please answer all that apply):

Waste to energy incineration\_\_\_\_\_

Recycling plant \_\_\_\_\_

Landfill\_\_\_\_\_

Collected by specialist waste recycling project, for instance Ocean Recovery Project

Other, please state\_\_\_\_\_

Don't know\_\_\_\_\_

Q4. Do you charge for waste disposal?

No\_

Yes, please state approximate cost per tonne\_\_\_\_

Don't know\_\_\_\_\_

Q5. What are the main challenges affecting the provision of waste/recycling facilities?\_\_\_\_\_

Q6. Which of the following materials can your Port recycle (please tick all that apply)

Gill net:\_\_\_\_\_

Trawl net\_\_\_\_\_

Pots:\_\_\_\_\_

Rope/line:\_\_\_\_\_

Other, please indicate:\_\_\_\_\_

Don't know:\_\_\_\_\_

Q7. Which projects do you work with, for instance, Ocean Recovery Project, Fishing For Litter, Fathoms Free, etc.?

Ocean Recovery Project\_\_\_\_

Fishing for litter

Fathoms free

Other, please state

Q8. Please indicate any support mechanisms that could be introduced to reduce the amount of lost fishing gear in the South West?

Q9. Please tell us any other information that you feel is relevant.

Table S2. Assumptions used to calculate the total packaging waste generation for agricultural activities in the South West, UK.

| Potato                                          |                                                        |                |                                                                                                     |                                  |                              |                                               |                       |
|-------------------------------------------------|--------------------------------------------------------|----------------|-----------------------------------------------------------------------------------------------------|----------------------------------|------------------------------|-----------------------------------------------|-----------------------|
| Crop requirements (agrochemicals and seed rate) | Description                                            | Amount applied | Single pack size                                                                                    | Packaging Plastic type           | Single packaging weight (gr) | No. of single packaging items required per ha | weight of sacks kg/ha |
| Seed_rate                                       | For variety Saturna                                    | 1890 kg /ha    | Bulk Bag Agricultural seeds, dimensions= 100X100X150, capacity 1250kg, canvas thickness = 160gr/m2. | Polypropylene                    | 1342.20                      | 1.512                                         | 2.029                 |
| Main fertiliser                                 | 14-14-21 (N+ Phosphorus+ Potassium), YaraMila-Maincrop | 1500 kg/ha     | 600 kg sacks                                                                                        | Polypropylene                    | 570.78                       | 2.5                                           | 1.426953125           |
| Fertiliser_2                                    | calcium nitrate, Yara                                  | 500 kg/ha      | 600 kg sacks                                                                                        | Polypropylene                    | 570.78                       | 0.833333333                                   | 0.475651042           |
| Fertiliser_3                                    | magnesium, Yara                                        | 20 L/ha        | 10L container                                                                                       | high density polyethylene (HDPE) | 450                          | 2                                             | 0.9                   |

|                     |                                                         |                                                                                                                                                             |                                             |               |      |       |         |
|---------------------|---------------------------------------------------------|-------------------------------------------------------------------------------------------------------------------------------------------------------------|---------------------------------------------|---------------|------|-------|---------|
| Fungicide           | Fezan                                                   | Low-risk situation<br>0.5L/ha every 14<br>days per 120 days.<br>Total days of<br>application<br>considered=8.6<br>times<br>Total amount<br>applied=4.3 L/ha | 5L container                                | HDPE          | 500  | 0.86  | 0.43    |
| Herbicide           | Mohawk CS                                               | 0.25 L/ha                                                                                                                                                   | 10L container                               | HDPE          | 1000 | 0.025 | 0.025   |
| Insecticide         | Sparviero                                               | 300ml every 7<br>days per 120 days<br>Total considered=<br>4.8L/ha                                                                                          | 1L container                                | HDPE          | 500  | 4.8   | 2.4     |
| Growth regulator    | certiseurope                                            | 11.1 L/ha once per<br>year                                                                                                                                  | 5L container                                | HDPE          | 500  | 2.22  | 1.11    |
| <b>Spring wheat</b> |                                                         |                                                                                                                                                             |                                             |               |      |       |         |
| Seed_rate           | applied to<br>varieties: KWS<br>Kilburn, KWS<br>Alderon | 240 kg/ha                                                                                                                                                   | 500 kg Bulk<br>Bag<br>Agricultural<br>seeds | Polypropylene | 130  | 0.48  | 0.0624  |
| Main fertiliser     | 20-10-10 (N+<br>Phosphorus+<br>Potassium)               | 375 kg/ha                                                                                                                                                   | 600 kg<br>capacity sacks                    | HDPE          | 130  | 0.625 | 0.08125 |
| Nitrogen            | Yara Vera<br>recomendation                              | 250kg/ha                                                                                                                                                    | 600 kg<br>capacity sacks                    | HDPE          | 130  | 2.4   | 0.312   |
| Fungicide           | Fezan                                                   | 1 L/ha                                                                                                                                                      | 5L container                                | HDPE          | 500  | 0.2   | 0.1     |
| Herbicide           | Mohawk CS                                               | 3.6 L/ha                                                                                                                                                    | 10L container                               | HDPE          | 1000 | 0.36  | 0.36    |
| Insecticide         | Sparviero                                               | 0.05 L/ha                                                                                                                                                   | 1L container                                | HDPE          | 500  | 0.05  | 0.025   |
| Growth regulator    | certiseurope                                            | 1.5 L/ha                                                                                                                                                    | 5L container                                | HDPE          | 500  | 0.3   | 0.15    |

| Winter wheat     |                                                                                                                                    |           |                                    |               |      |             |             |
|------------------|------------------------------------------------------------------------------------------------------------------------------------|-----------|------------------------------------|---------------|------|-------------|-------------|
| Seed_rate        | applied to varieties: KWS Kilburn, KWS Alderon                                                                                     | 200 kg/ha | 500 kg Bulk Bag Agricultural seeds | Polypropylene | 130  | 0.4         | 0.052       |
| Main fertiliser  | 20-10-10 (N+ Phosphorus+ Potassium) kg/ha                                                                                          | 375 kg/ha | 600 kg capacity sacks              | HDPE          | 130  | 0.625       | 0.08125     |
| Nitrogen         | Yara Vera recomendation                                                                                                            | 750 kg/ha | 600 kg capacity sacks              | HDPE          | 130  | 0.8         | 0.104       |
| Fungicide        | Fezan                                                                                                                              | 1 L/ha    | 5L container                       | HDPE          | 500  | 0.2         | 0.1         |
| Herbicide        | Mohawk CS                                                                                                                          | 3.6 L/ha  | 10L container                      | HDPE          | 1000 | 0.36        | 0.36        |
| Insecticide      | Sparviero                                                                                                                          | 0.05 L/ha | 1L container                       | HDPE          | 500  | 0.05        | 0.025       |
| Growth regulator | certiseurope                                                                                                                       | 1.5 L/ha  | 5L container                       | HDPE          | 500  | 0.3         | 0.15        |
| Spring barley    |                                                                                                                                    |           |                                    |               |      |             |             |
| Seed_rate        | Average seed rates. No specific variety was considered, as most spring malting barley grown in England (Barley growth guide, AHDB) | 174 kg/ha | 500 kg Bulk Bag Agricultural seeds | Polypropylene | 130  | 0.348       | 0.04524     |
| Main fertiliser  | 20-10-10 (N+ Phosphorus+ Potassium) kg/ha                                                                                          | 500 kg/ha | 600 kg capacity sacks              | HDPE          | 130  | 0.833333333 | 0.108333333 |
| Fungicide        | Fezan                                                                                                                              | 1 L/ha    | 5L container                       | HDPE          | 500  | 0.2         | 0.1         |
| Herbicide        | Mohawk CS                                                                                                                          | 3.6 L/ha  | 10L container                      | HDPE          | 1000 | 0.36        | 0.36        |

|                      |                                                                                                                                    |           |                                    |               |      |             |             |
|----------------------|------------------------------------------------------------------------------------------------------------------------------------|-----------|------------------------------------|---------------|------|-------------|-------------|
| Insecticide          | Sparviero                                                                                                                          | 0.05 L/ha | 1L container                       | HDPE          | 500  | 0.05        | 0.025       |
| Growth regulator     | certiseurope                                                                                                                       | 1.5 L/ha  | 5L container                       | HDPE          | 500  | 0.3         | 0.15        |
| <b>Winter barley</b> |                                                                                                                                    |           |                                    |               |      |             |             |
| Seed_rate            | Average seed rates. No specific variety was considered, as most spring malting barley grown in England (Barley growth guide, AHDB) | 190 kg/ha | 500 kg Bulk Bag Agricultural seeds | Polypropylene | 130  | 0.379241517 | 0.049680639 |
| Main fertiliser      | 20-10-10 (N+ Phosphorus+ Potassium) kg/ha                                                                                          | 250 kg/ha | 600 kg capacity sacks              | HDPE          | 130  | 0.416666667 | 0.054166667 |
| Fungicide            | Fezan                                                                                                                              | 1 L/ha    | 5L container                       | HDPE          | 500  | 0.2         | 0.1         |
| Herbicide            | Mohawk CS                                                                                                                          | 3.6 L/ha  | 10L container                      | HDPE          | 1000 | 0.36        | 0.36        |
| Insecticide          | Sparviero                                                                                                                          | 0.05 L/ha | 1L container                       | HDPE          | 500  | 0.05        | 0.025       |
| Growth regulator     | certiseurope                                                                                                                       | 1.5 L/ha  | 5L container                       | HDPE          | 500  | 0.3         | 0.15        |
